# Supplementary material for: Serum Amyloid A as a Potential Biomarker in Inflammatory Bowel Diseases, Especially in Patients with Low C-Reactive Protein
Source: MDPI journal article supplement (doi:10.3390/ijms25021177), 2024-01-18
Supplement: s1 [file s1]

Table S1: Correlation analyses with SAA

| Groups (n)                                      | Spearman's coefficient of correlation* |                     |                   | P-Value            |                     |                   |
|-------------------------------------------------|----------------------------------------|---------------------|-------------------|--------------------|---------------------|-------------------|
| <b>All cases (306)</b>                          |                                        |                     |                   |                    |                     |                   |
| FC                                              | 0.365                                  |                     |                   | < 0.001            |                     |                   |
| CRP                                             | 0.623                                  |                     |                   | < 0.001            |                     |                   |
| NLR                                             | 0.381                                  |                     |                   | < 0.001            |                     |                   |
| <b>CD (182), UC (116), IBDU (8)</b>             | <b>CD</b>                              | <b>UC</b>           | <b>IBDU</b>       | <b>CD</b>          | <b>UC</b>           | <b>IBDU</b>       |
| HBI                                             | <b>0.082</b>                           | -                   | -                 | <b>0.276</b>       | -                   | -                 |
| SCCAI                                           |                                        | 0.300               | -                 | -                  | 0.001               | -                 |
| FC                                              | 0.376                                  | 0.300               | <b>0.700</b>      | < 0.001            | 0.001               | <b>0.053</b>      |
| CRP                                             | 0.626                                  | 0.607               | <b>0.669</b>      | < 0.001            | < 0.001             | <b>0.070</b>      |
| NLR                                             | 0.405                                  | 0.294               | <b>0.599</b>      | < 0.001            | 0.002               | <b>0.117</b>      |
| <b>Disease duration (93, 113, 100)</b>          | <b>0 – 5 years</b>                     | <b>6 – 15 years</b> | <b>≥ 16 years</b> | <b>0 – 5 years</b> | <b>6 – 15 years</b> | <b>≥ 16 years</b> |
| FC                                              | 0.480                                  | 0.333               | 0.245             | < 0.001            | < 0.001             | 0.014             |
| CRP                                             | 0.640                                  | 0.662               | 0.550             | < 0.001            | < 0.001             | < 0.001           |
| NLR                                             | 0.403                                  | 0.454               | 0.243             | < 0.001            | < 0.001             | 0.015             |
| <b>Extraintestinal manifestation (102, 204)</b> | <b>Yes</b>                             |                     | <b>No</b>         | <b>Yes</b>         |                     | <b>No</b>         |
| FC                                              | 0.275                                  |                     | 0.415             | 0.005              |                     | < 0.001           |
| CRP                                             | 0.612                                  |                     | 0.630             | < 0.001            |                     | < 0.001           |
| NLR                                             | 0.484                                  |                     | 0.337             | < 0.001            |                     | < 0.001           |
| <b>History of resecting surgery (85, 221)</b>   | <b>Yes</b>                             |                     | <b>No</b>         | <b>Yes</b>         |                     | <b>No</b>         |
| FC                                              | 0.289                                  |                     | 0.393             | 0.007              |                     | < 0.001           |
| CRP                                             | 0.529                                  |                     | 0.659             | < 0.001            |                     | < 0.001           |
| NLR                                             | 0.308                                  |                     | 0.399             | 0.004              |                     | < 0.001           |
| <b>Biologic therapy (152, 154)</b>              | <b>Yes</b>                             |                     | <b>No</b>         | <b>Yes</b>         |                     | <b>No</b>         |
| FC                                              | 0.461                                  |                     | 0.255             | < 0.001            |                     | 0.001             |
| CRP                                             | 0.625                                  |                     | 0.618             | < 0.001            |                     | < 0.001           |
| NLR                                             | 0.417                                  |                     | 0.277             | < 0.001            |                     | < 0.001           |

\*The values in bold are not significant; CD Crohn's disease, UC Ulcerative colitis, IBDU Inflammatory bowel disease unclassified

Table S2: Correlation analyses with SAA for the Montreal classification

| Groups (n)                          | Spearman's coefficient of correlation* |  | P-Value |
|-------------------------------------|----------------------------------------|--|---------|
| <b>CD: L1 = terminal ileal (68)</b> |                                        |  |         |
| FC                                  | 0.287                                  |  | 0.018   |
| CRP                                 | 0.549                                  |  | < 0.001 |
| NLR                                 | 0.335                                  |  | 0.005   |
| <b>CD: L2 = colonic (21)</b>        |                                        |  |         |
| FC                                  | 0.572                                  |  | 0.007   |
| CRP                                 | 0.630                                  |  | 0.002   |
| NLR                                 | <b>0.393</b>                           |  | 0.078   |
| <b>CD: L3 = ileocolonic (84)</b>    |                                        |  |         |
| FC                                  | 0.417                                  |  | < 0.001 |
| CRP                                 | 0.699                                  |  | < 0.001 |

|                                                       |              |         |
|-------------------------------------------------------|--------------|---------|
| NLR                                                   | 0.431        | < 0.001 |
| <b>CD: L4 = isolated upper disease (11)</b>           |              |         |
| FC                                                    | 0.689        | 0.019   |
| CRP                                                   | <b>0.511</b> | 0.109   |
| NLR                                                   | <b>0.540</b> | 0.087   |
| <b>CD: B1 = non-stricturing, non-penetrating (70)</b> |              |         |
| FC                                                    | 0.484        | < 0.001 |
| CRP                                                   | 0.574        | < 0.001 |
| NLR                                                   | 0.486        | < 0.001 |
| <b>CD: B2 = stricturing (64)</b>                      |              |         |
| FC                                                    | 0.255        | 0.042   |
| CRP                                                   | 0.675        | < 0.001 |
| NLR                                                   | <b>0.231</b> | 0.067   |
| <b>CD: B3 = penetrating (63)</b>                      |              |         |
| FC                                                    | 0.313        | 0.013   |
| CRP                                                   | 0.700        | < 0.001 |
| NLR                                                   | 0.362        | 0.004   |
| <b>UC: E1 = ulcerative proctitis (12)</b>             |              |         |
| FC                                                    | <b>0.090</b> | 0.780   |
| CRP                                                   | 0.828        | < 0.001 |
| NLR                                                   | <b>0.414</b> | 0.181   |
| <b>UC: E2 = left-sided UC (44)</b>                    |              |         |
| FC                                                    | <b>0.251</b> | 0.100   |
| CRP                                                   | 0.628        | < 0.001 |
| NLR                                                   | 0.319        | 0.035   |
| <b>UC: E3 = extensive UC (64)</b>                     |              |         |
| FC                                                    | 0.424        | < 0.001 |
| CRP                                                   | 0.590        | < 0.001 |
| NLR                                                   | <b>0.200</b> | 0.123   |

*\*The values in bold are not significant; L Location, B Behavior, E Extent, CD Crohn's disease, UC Ulcerative colitis*
